# Supplementary material for: Nicotinamide riboside alleviates sweeteners-induced brain and cognitive impairments in immature mice
Source: Royal Society of Chemistry journal article supplement (doi:10.1039/d4fo05553e), 2025-01-01

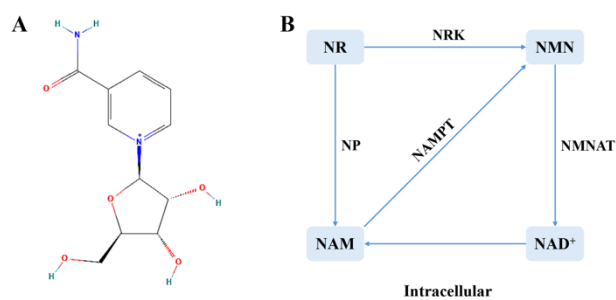

**Supplemental Figure 1.** (A) The chemical structure of NR. (B) The process of NR boosting NAD<sup>+</sup> biosynthesis in cells. Nicotinamide adenine dinucleotide (NAD<sup>+</sup>); nicotinamide riboside (NR); nicotinamide mononucleotide (NMN); nicotinamide (NAM); nucleoside phosphorylase (NP); nicotinamide phosphoribosyltransferase (NAMPT); nicotinamide ribose kinases (NRK); NMN/NaMN adenylyltransferases (NMNAT).

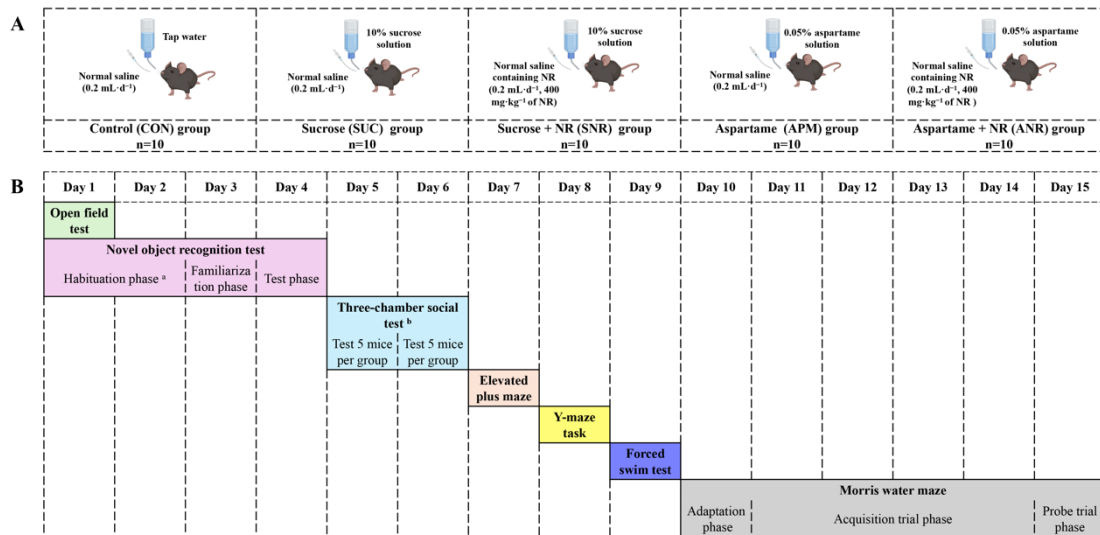

**Supplemental Figure 2.** (A) The specific exposure process of sweeteners and intervention strategy of NR in mice. (B) The specific time schedule of behavioural tests. <sup>a</sup> Since the open field test and the novel object recognition test were conducted in the same open bin, the open field test in Day 1 was also considered as the first day test for the habituation phase of the novel object recognition test. <sup>b</sup> Due to the long duration of each mice of the three-chamber social test, the whole test was conducted over two days, with 5 mice in each group tested on each day.

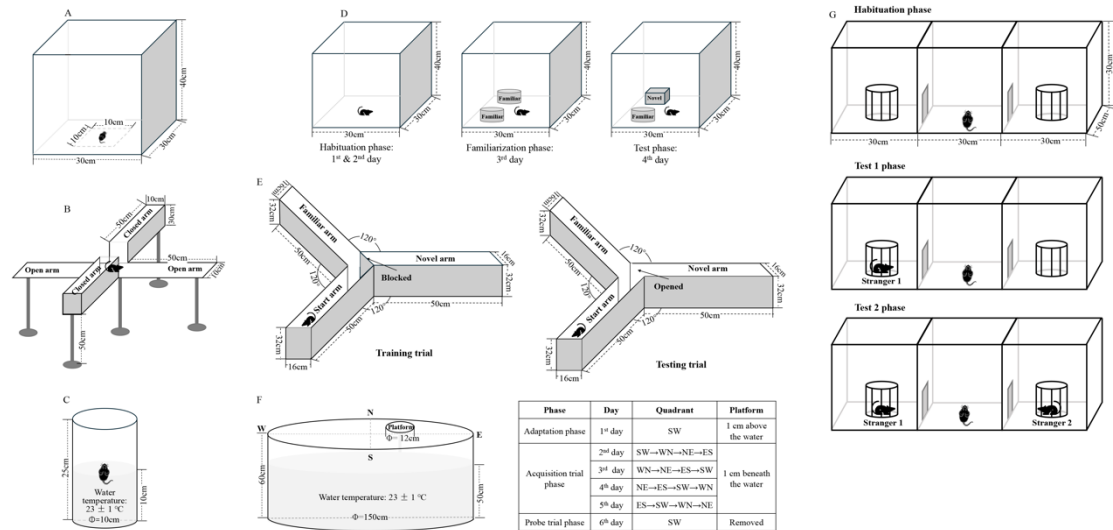

**Supplemental Figure 3. Schematic diagram of behavioral tests equipment and process.** (A) Open field test. (B) Elevated plus maze. (C) Forced swim test. (D) Novel object recognition test. (E) Y-maze task. (F) Morris water maze. (G) Three-chamber social test.

**Supplemental Table 1. Primers for real-time PCR**

| <b>Gene</b>      | <b>Primer (5'-3')</b> |
|------------------|-----------------------|
| <b>p62</b>       |                       |
| Forward          | CTCATAGCCGCTGGCTTCGG  |
| Reverse          | TGCCCACTCTCCCCACAT    |
| <b>Beclin1</b>   |                       |
| Forward          | CTGGGGACCTTTTTGACATC  |
| Reverse          | TTGCGGTTCTTTCCACGTC   |
| <b>LC3</b>       |                       |
| Forward          | CCACACCCATCGCTGACA    |
| Reverse          | AAAGAGCAACCCGAACAT    |
| <b>GAPDH</b>     |                       |
| Forward          | TGTTTCCTCGTCCCGTAG    |
| Reverse          | CAATCTCCACTTTGCCACT   |
| <b>Caspase-3</b> |                       |
| Forward          | ACTGGAAAGCCGAAACTC    |
| Reverse          | GTCCCACTGTCTGTCTCAAT  |
| <b>BCL-2</b>     |                       |
| Forward          | CRACTTCTTCAGCATCAGGA  |
| Reverse          | TGAGCCACAGGGAGGTTCT   |
| <b>Bax</b>       |                       |
| Forward          | CGCGTGGTTGCCCTTCTTA   |
| Reverse          | TTCCCAGCCACCCTGGTCTT  |

Brain

| Akt (1)   | Akt (2)   | Akt (3)   |
|-----------|-----------|-----------|
| GAPDH (1) | GAPDH (2) | GAPDH (3) |

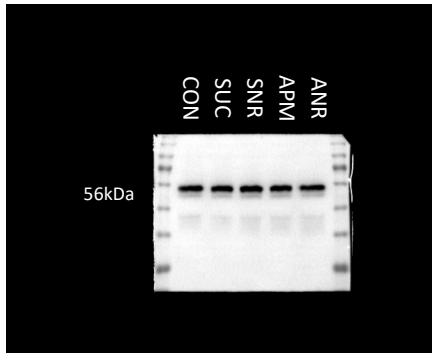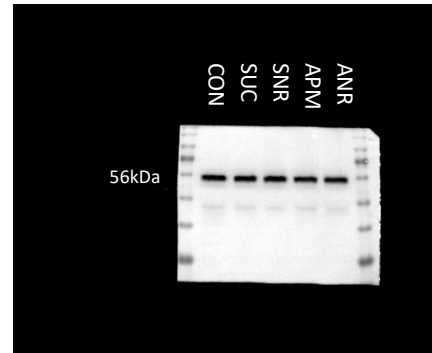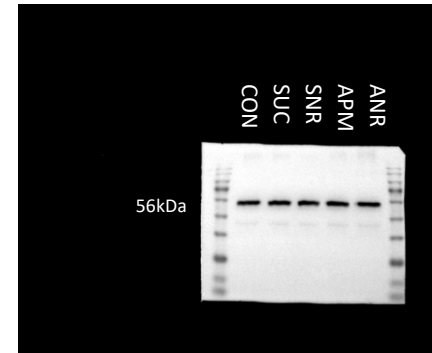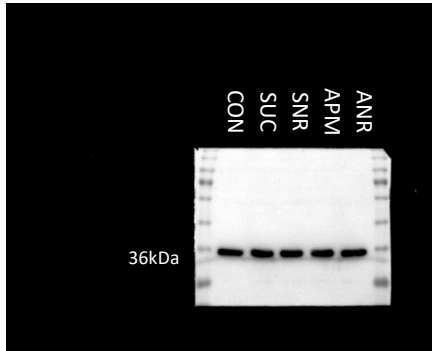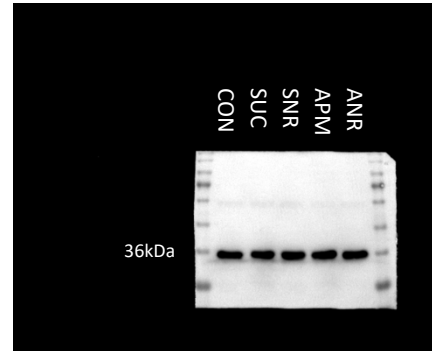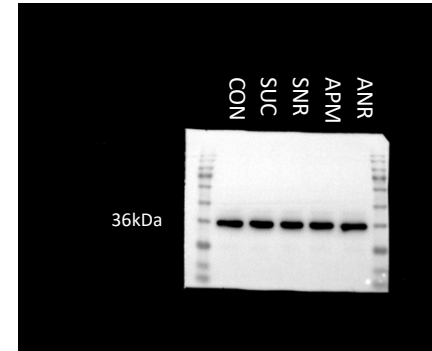

|           |           |           |
|-----------|-----------|-----------|
| p-Akt (1) | p-Akt (2) | p-Akt (3) |
| GAPDH (1) | GAPDH (2) | GAPDH (3) |

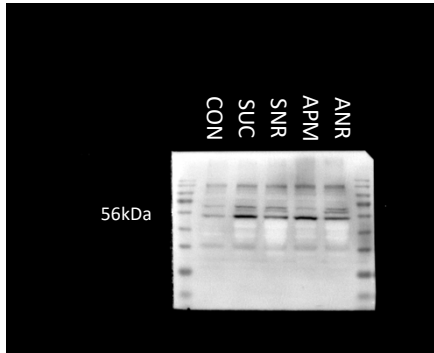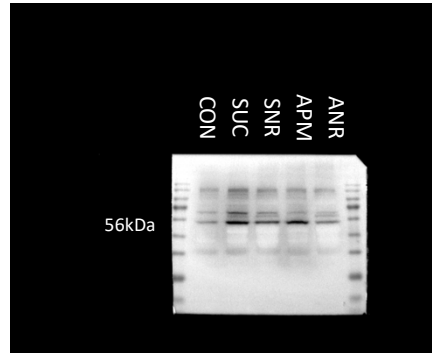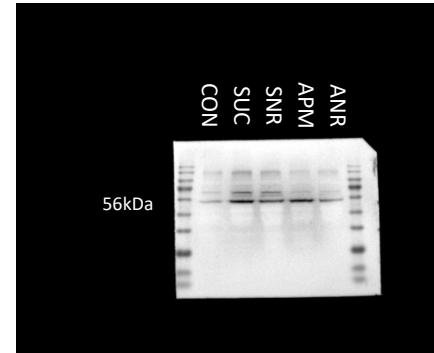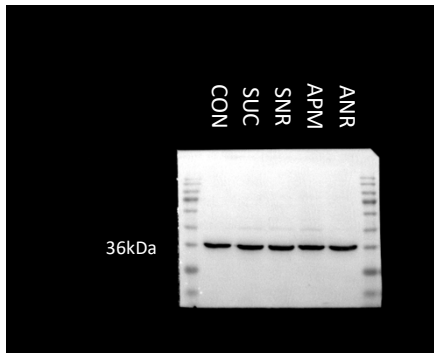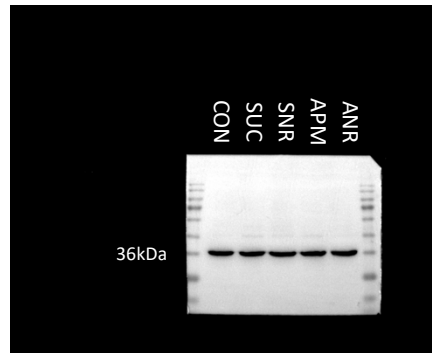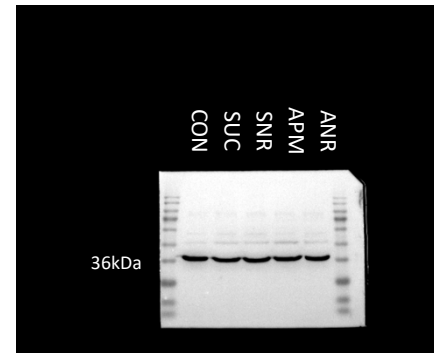

| BAX (1)   | BAX (2)   | BAX (3)   |
|-----------|-----------|-----------|
| GAPDH (1) | GAPDH (2) | GAPDH (3) |

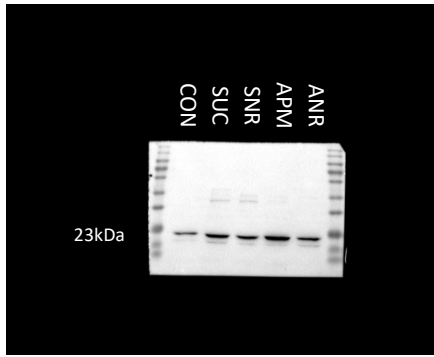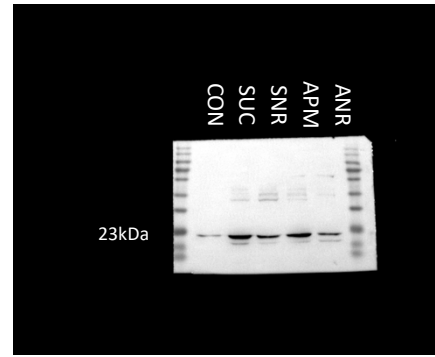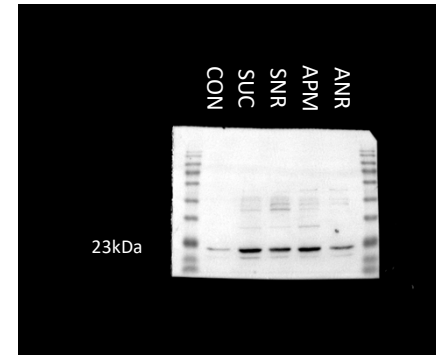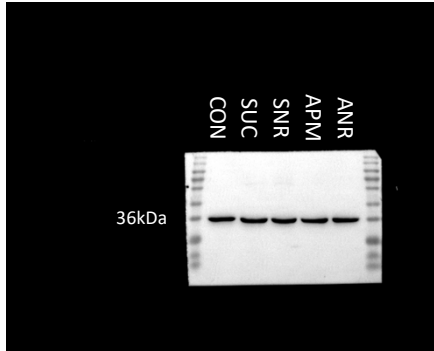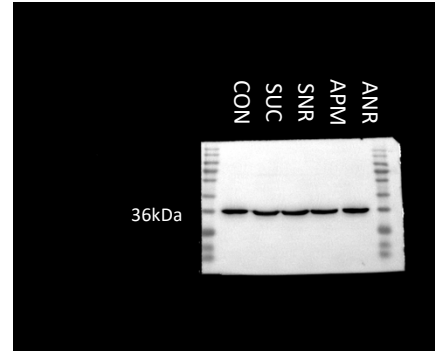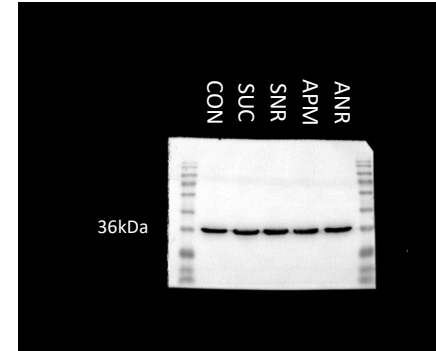

|           |           |           |
|-----------|-----------|-----------|
| Bcl-2 (1) | Bcl-2 (2) | Bcl-2 (3) |
| GAPDH (1) | GAPDH (2) | GAPDH (3) |

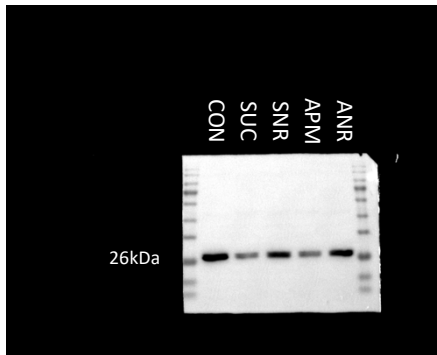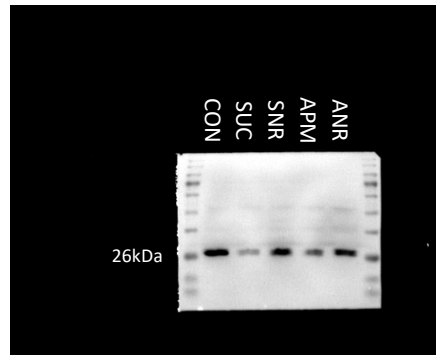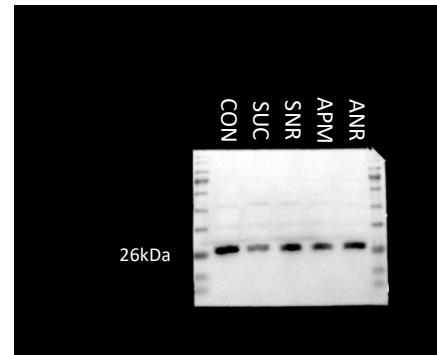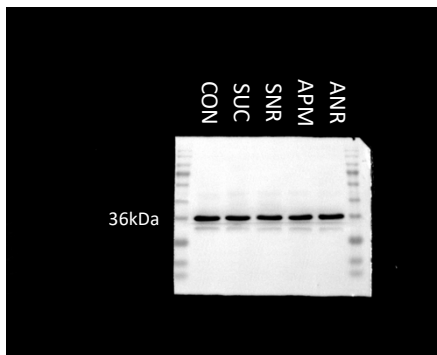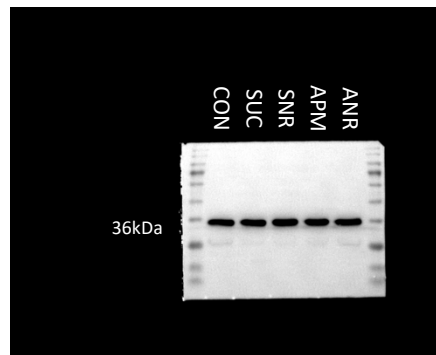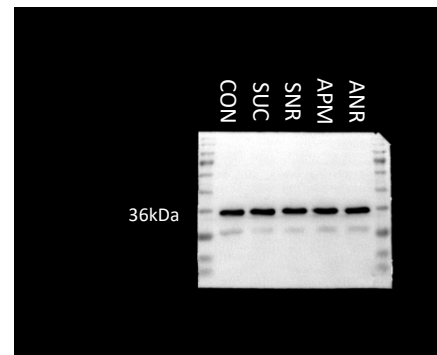



|              |              |              |
|--------------|--------------|--------------|
| Beclin 1 (1) | Beclin 1 (2) | Beclin 1 (3) |
| GAPDH (1)    | GAPDH (2)    | GAPDH (3)    |

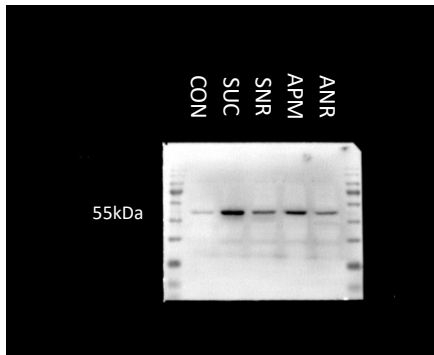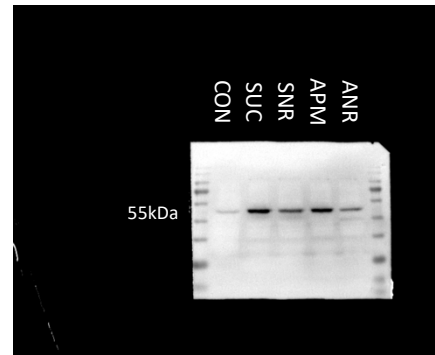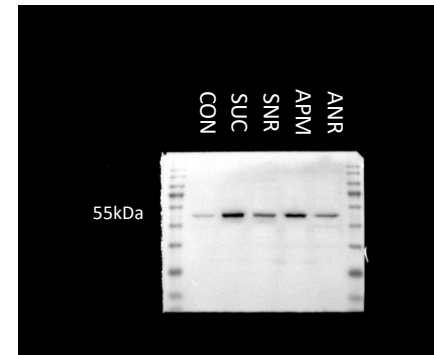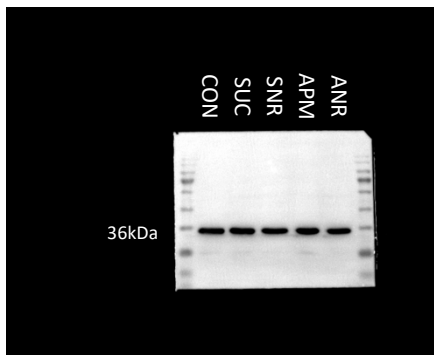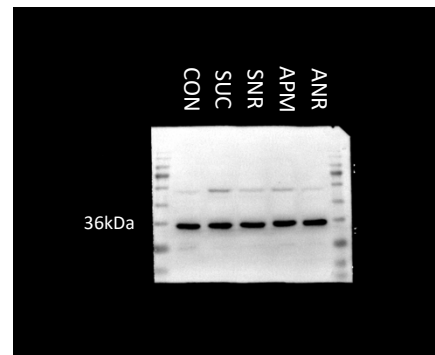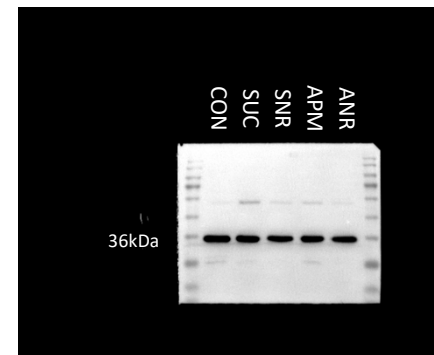

| Caspase 3 (1) | Caspase 3 (2) | Caspase 3 (3) |
|---------------|---------------|---------------|
| GAPDH (1)     | GAPDH (2)     | GAPDH (3)     |

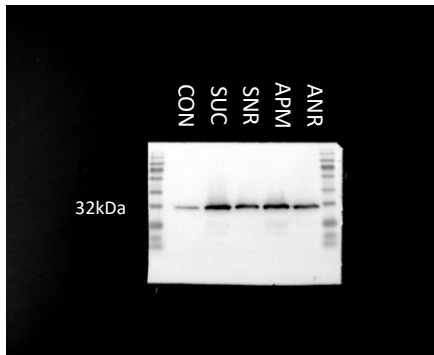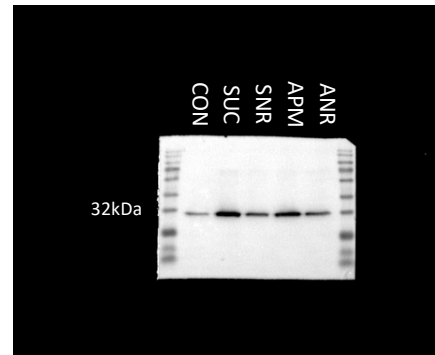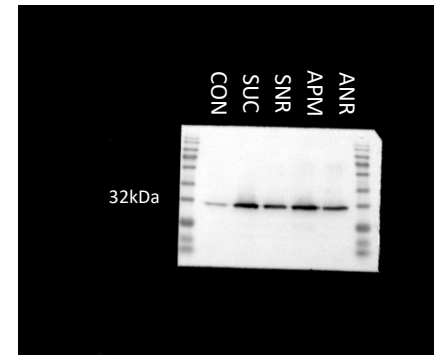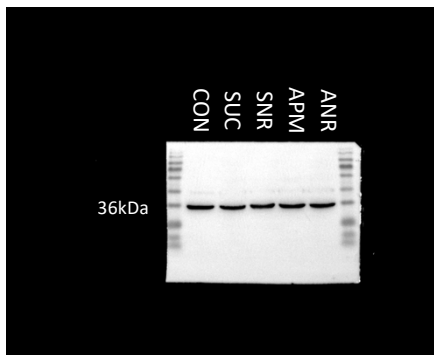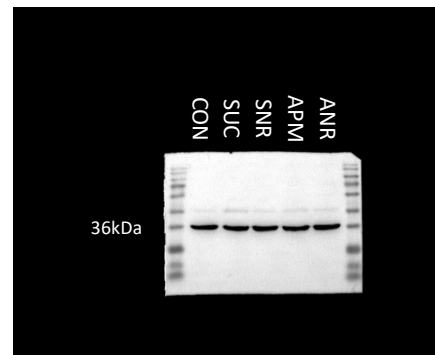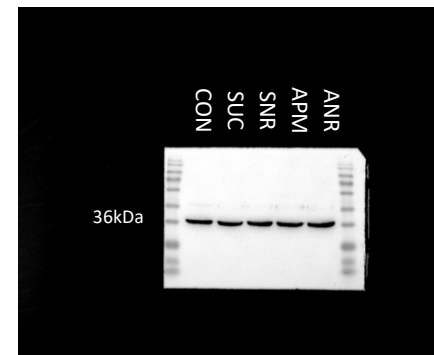

|           |           |           |
|-----------|-----------|-----------|
| FOXO1 (1) | FOXO1 (2) | FOXO1 (3) |
| GAPDH (1) | GAPDH (2) | GAPDH (3) |

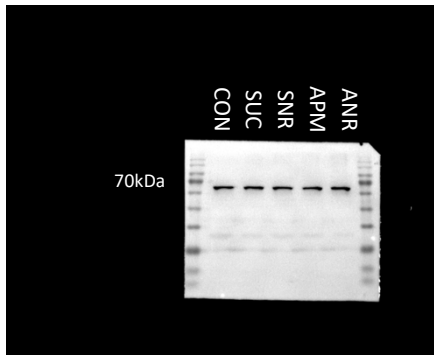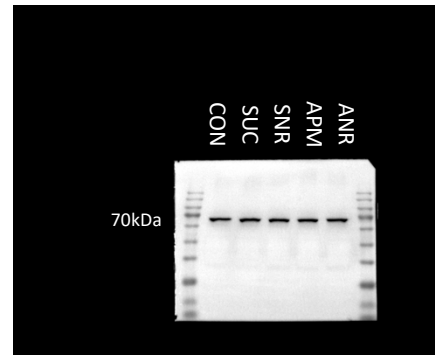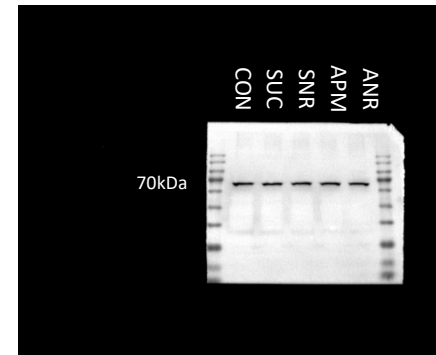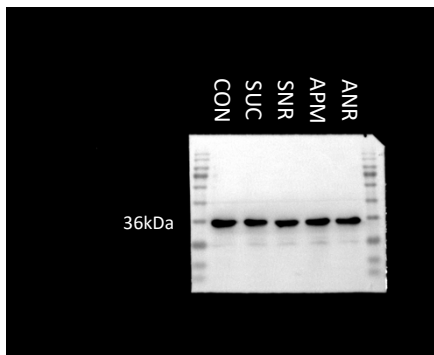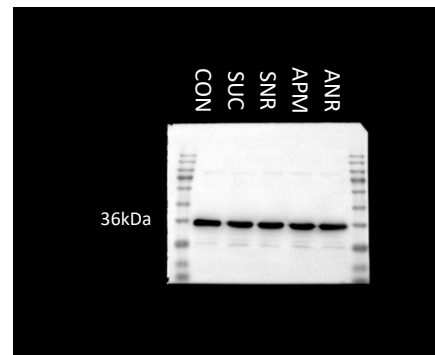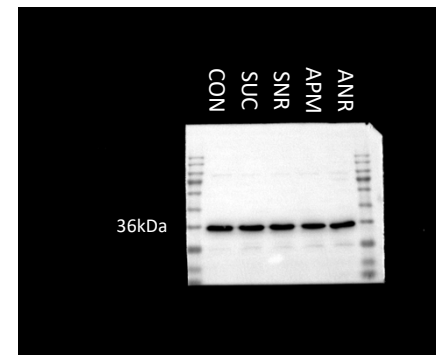

|             |             |             |
|-------------|-------------|-------------|
| p-FOXO1 (1) | p-FOXO1 (2) | p-FOXO1 (3) |
| GAPDH (1)   | GAPDH (2)   | GAPDH (3)   |

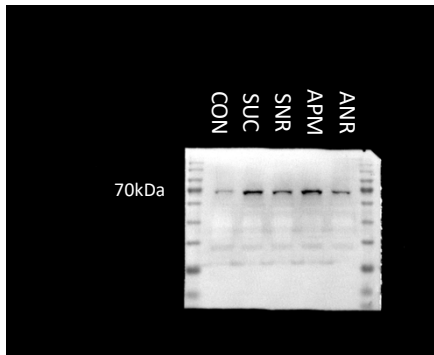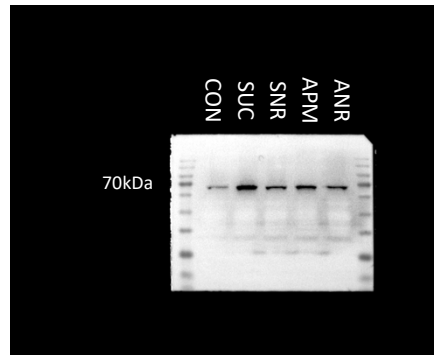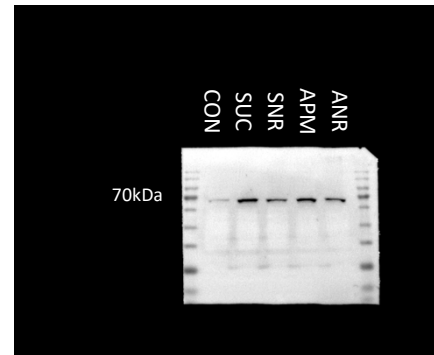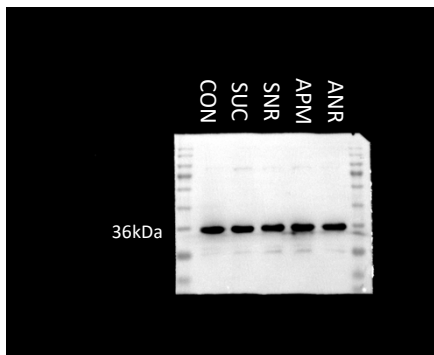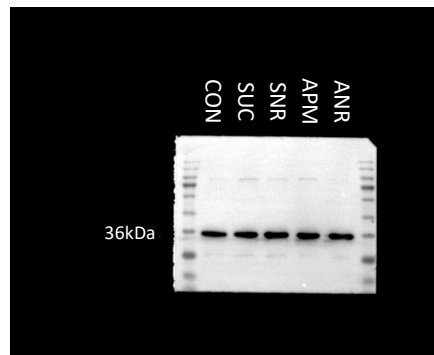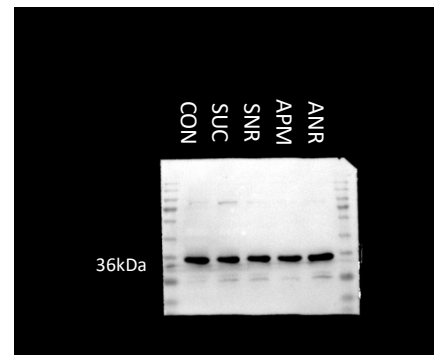

|           |           |           |
|-----------|-----------|-----------|
| HO-1 (1)  | HO-1 (2)  | HO-1 (3)  |
| GAPDH (1) | GAPDH (2) | GAPDH (3) |

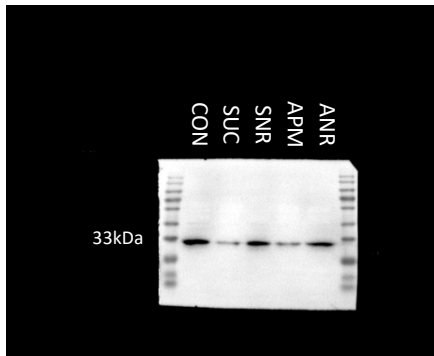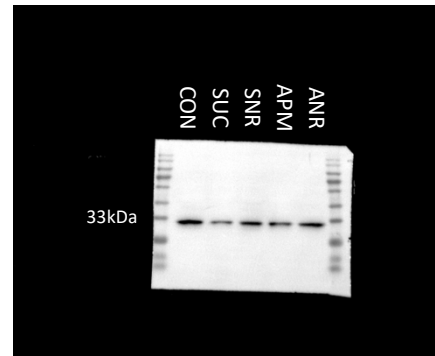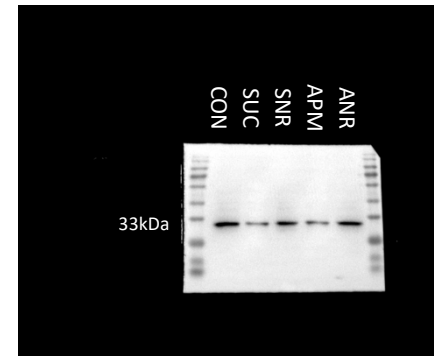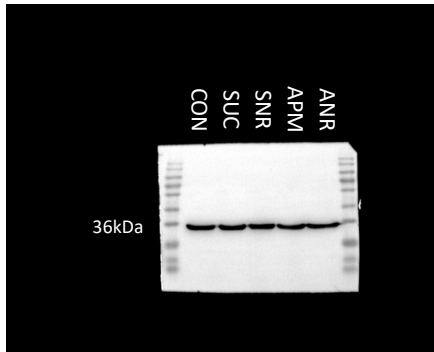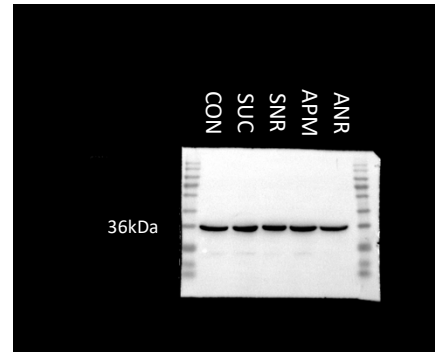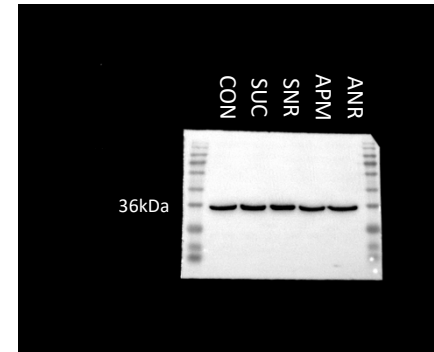

|           |           |           |
|-----------|-----------|-----------|
| Keap1 (1) | Keap1 (2) | Keap1 (3) |
| GAPDH (1) | GAPDH (2) | GAPDH (3) |

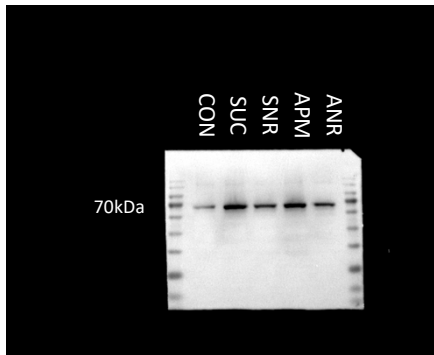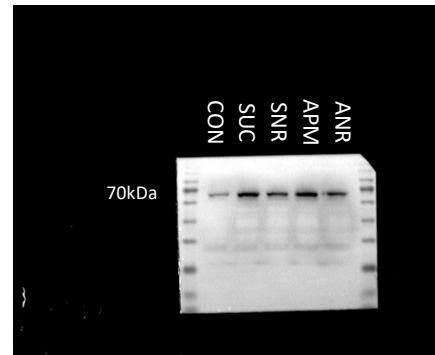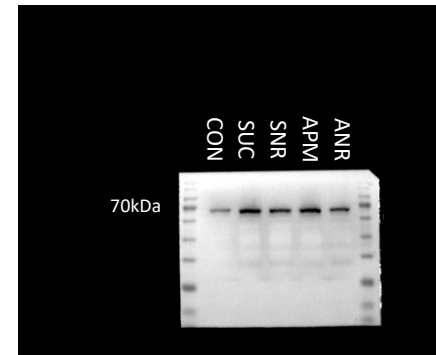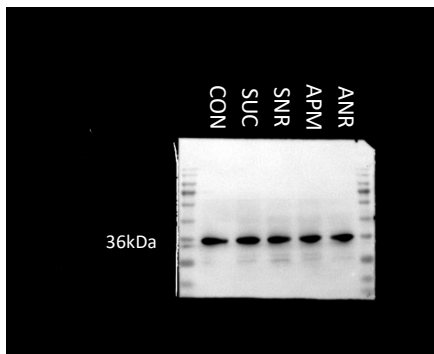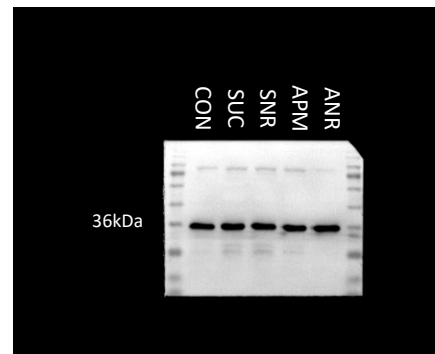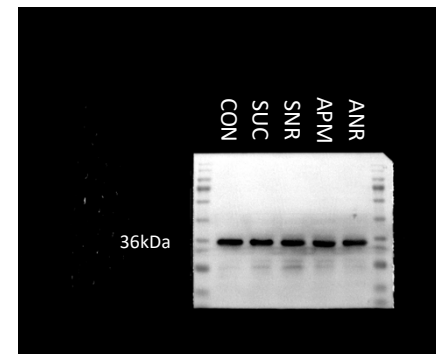

| LC3 (1)   | LC3 (2)   | LC3 (3)   |
|-----------|-----------|-----------|
| GAPDH (1) | GAPDH (2) | GAPDH (3) |

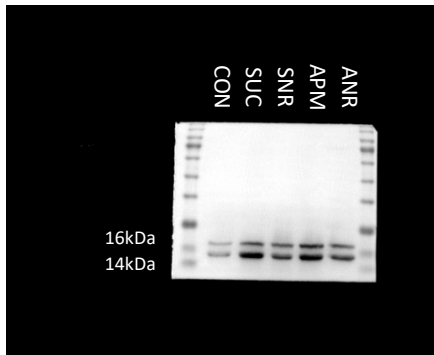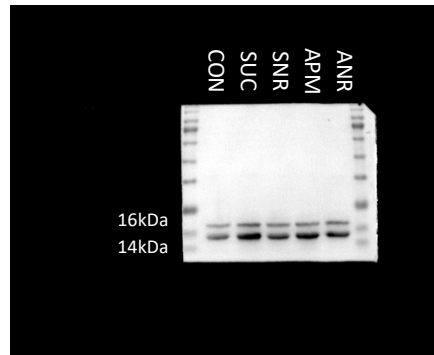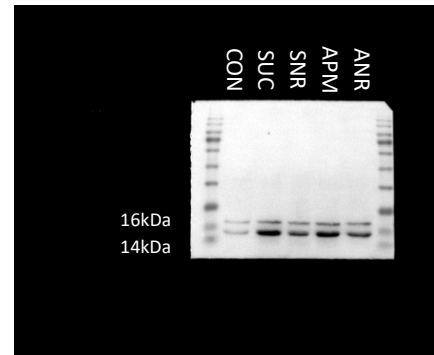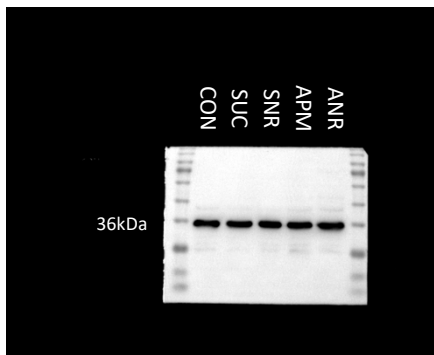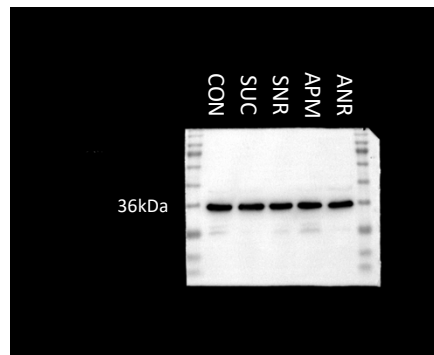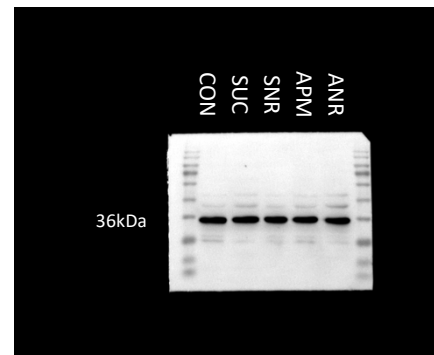

|           |           |           |
|-----------|-----------|-----------|
| mTOR (1)  | mTOR (2)  | mTOR (3)  |
| GAPDH (1) | GAPDH (2) | GAPDH (3) |

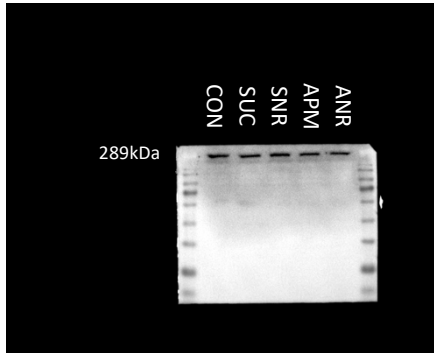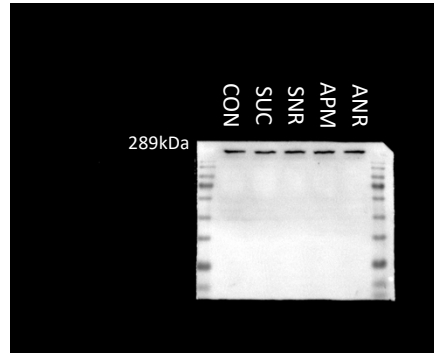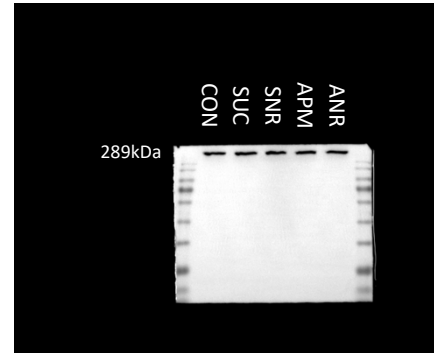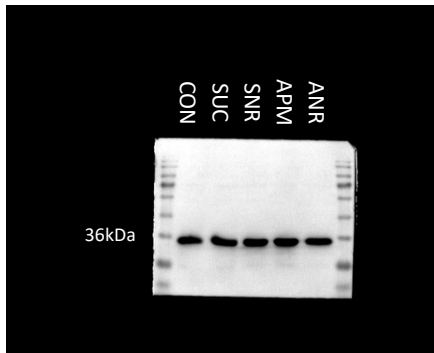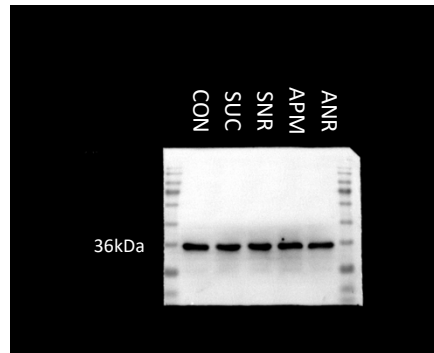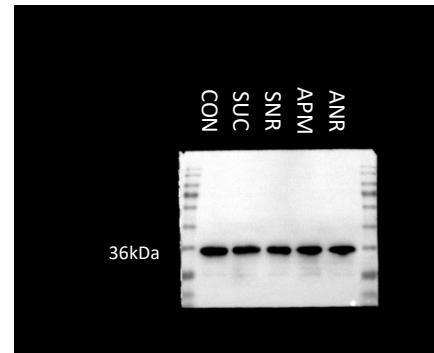



|            |            |            |
|------------|------------|------------|
| p-mTOR (1) | p-mTOR (2) | p-mTOR (3) |
| GAPDH (1)  | GAPDH (2)  | GAPDH (3)  |

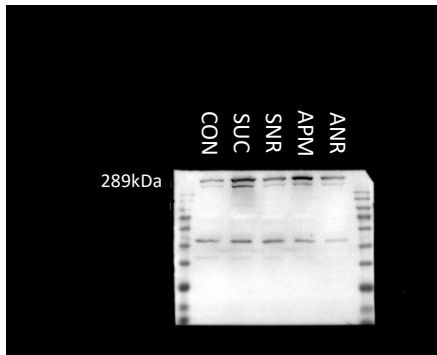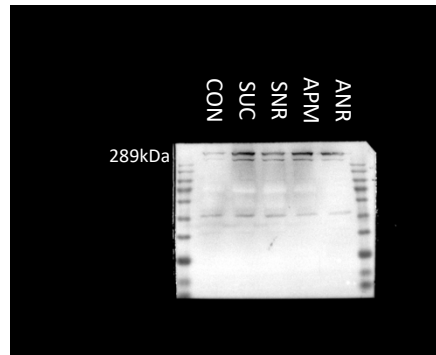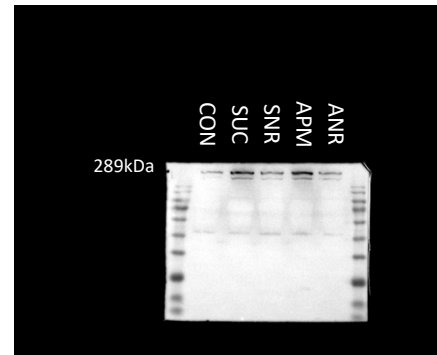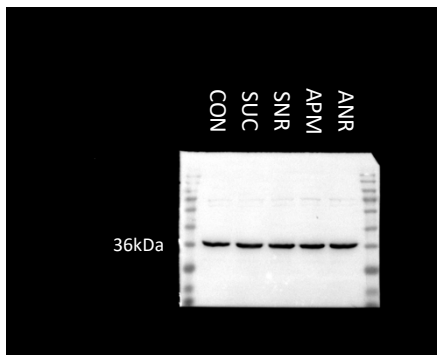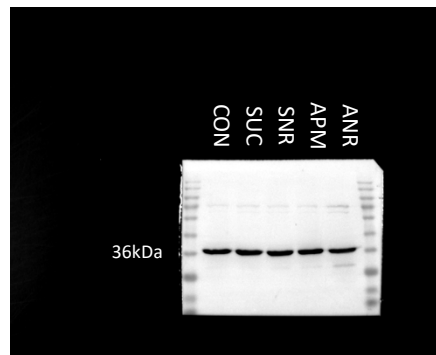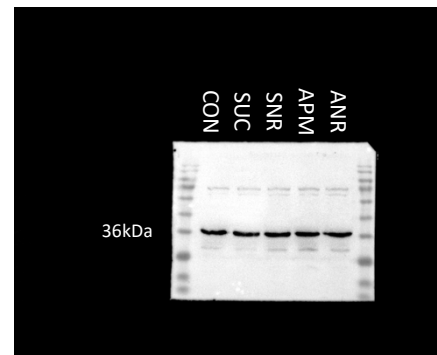

|           |           |           |
|-----------|-----------|-----------|
| NQO-1 (1) | NQO-1 (2) | NQO-1 (3) |
| GAPDH (1) | GAPDH (2) | GAPDH (3) |

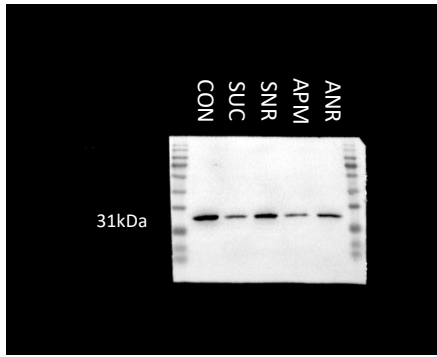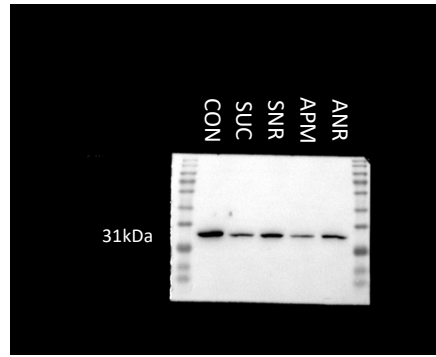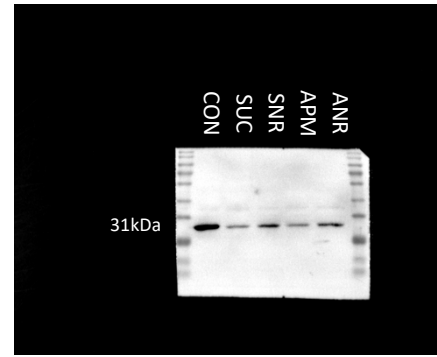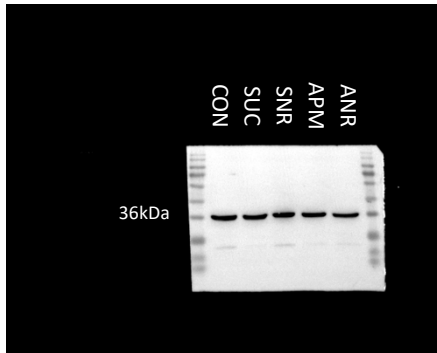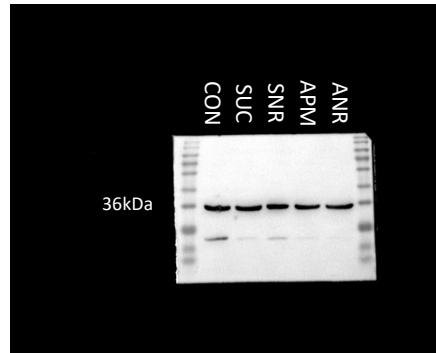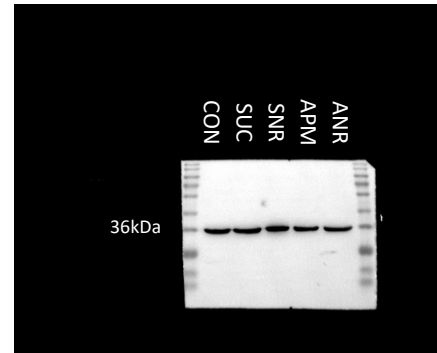

|            |            |            |
|------------|------------|------------|
| T-Nrf2 (1) | T-Nrf2 (2) | T-Nrf2 (3) |
| GAPDH (1)  | GAPDH (2)  | GAPDH (3)  |

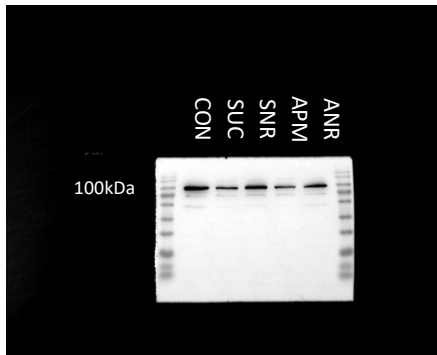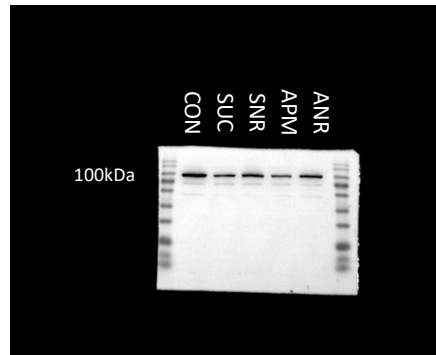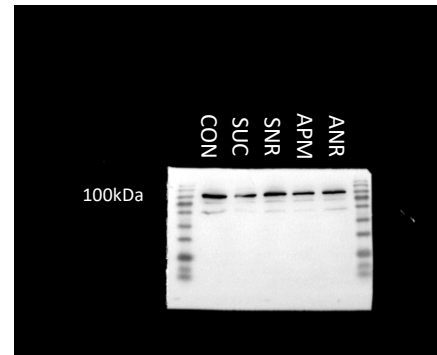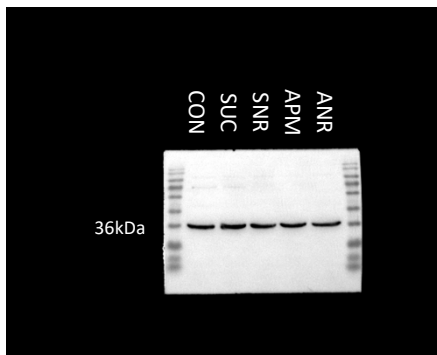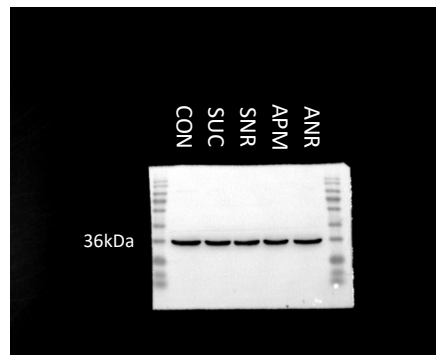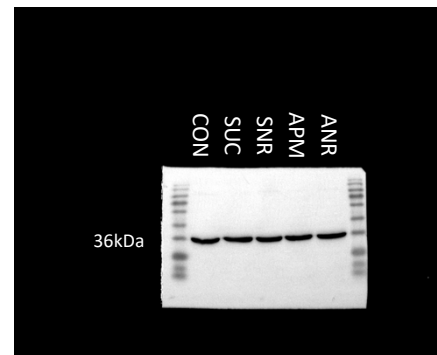

|              |              |              |
|--------------|--------------|--------------|
| N-Nrf2 (1)   | N-Nrf2 (2)   | N-Nrf2 (3)   |
| Lamin B1 (1) | Lamin B1 (2) | Lamin B1 (3) |

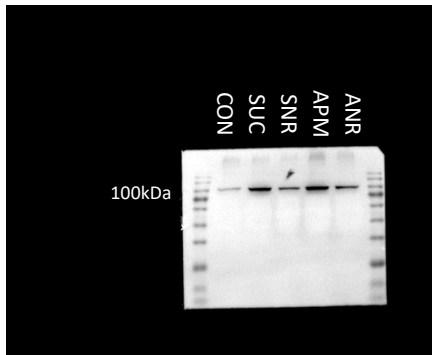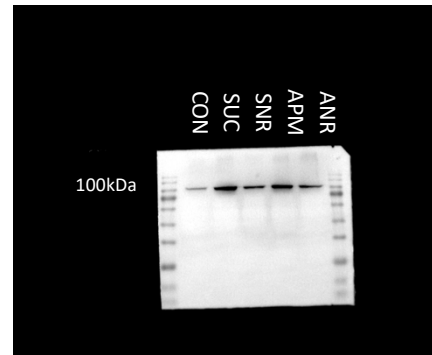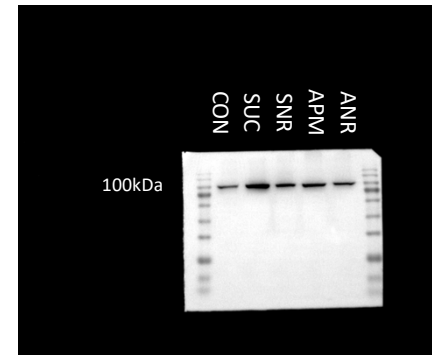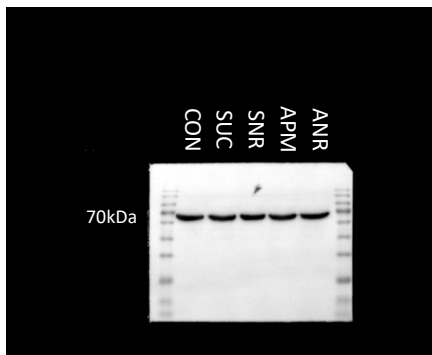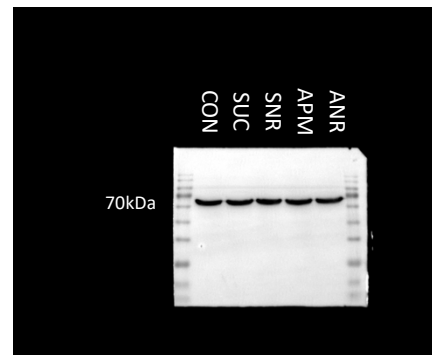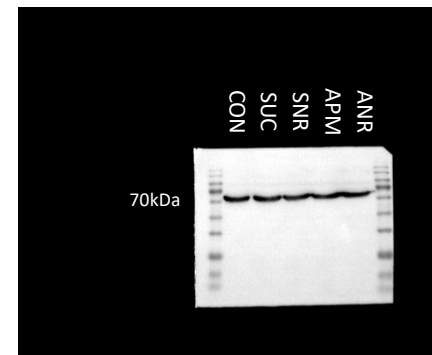

|           |           |           |
|-----------|-----------|-----------|
| PI3K (1)  | PI3K (2)  | PI3K (3)  |
| GAPDH (1) | GAPDH (2) | GAPDH (3) |

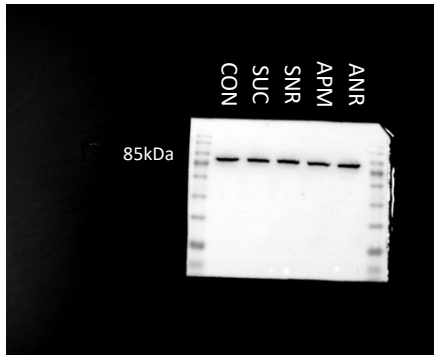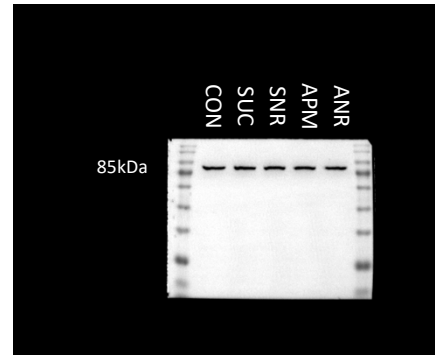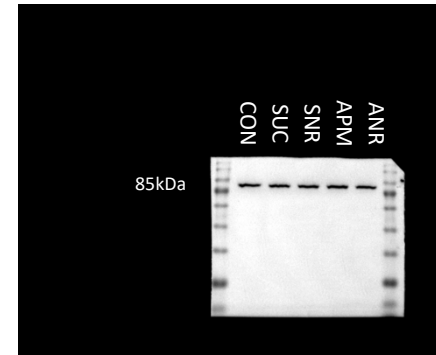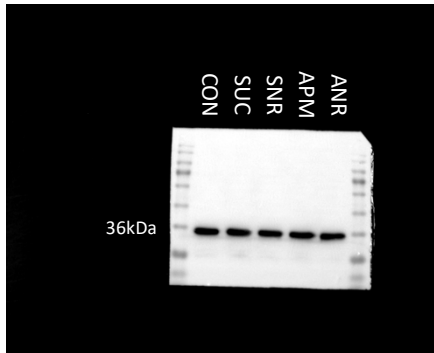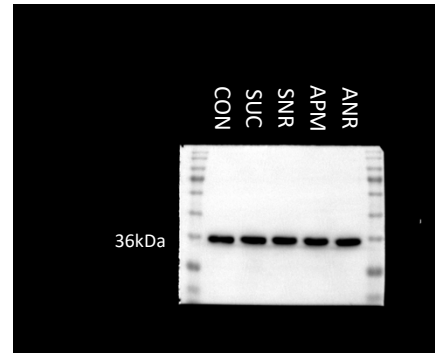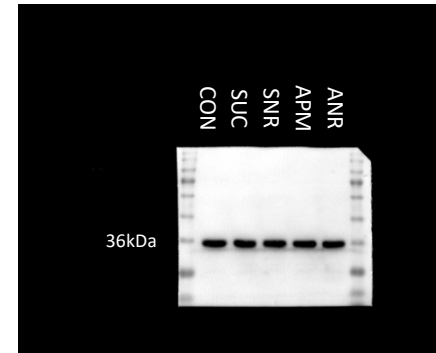

|            |            |            |
|------------|------------|------------|
| p-PI3K (1) | p-PI3K (2) | p-PI3K (3) |
| GAPDH (1)  | GAPDH (2)  | GAPDH (3)  |

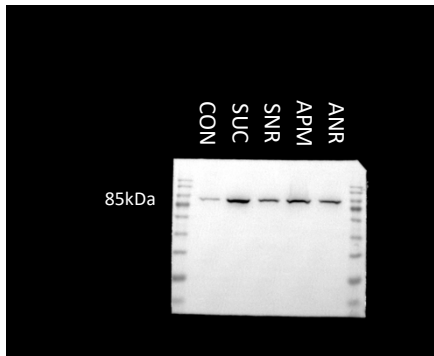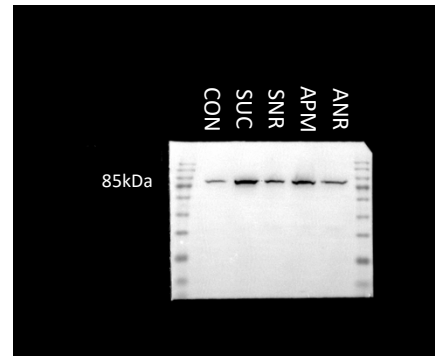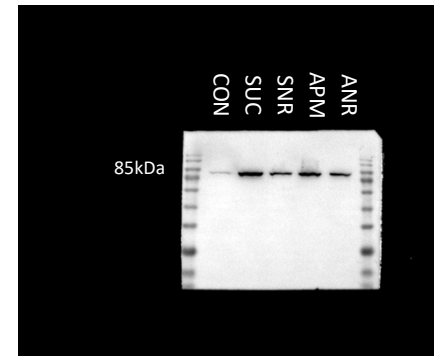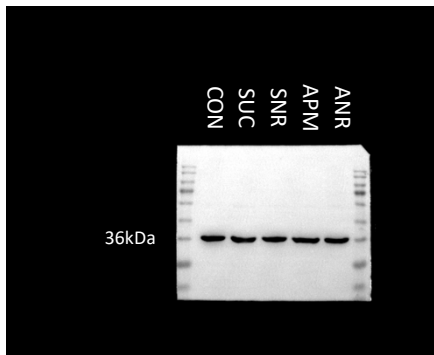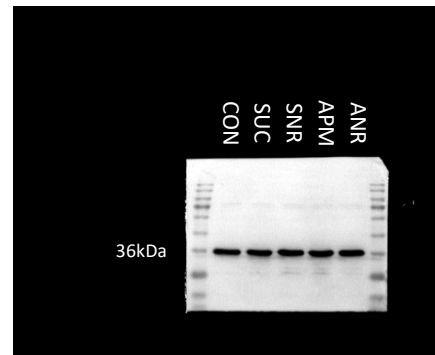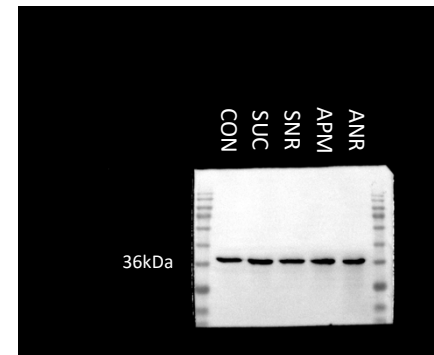

| P62 (1)   | P62 (2)   | P62 (3)   |
|-----------|-----------|-----------|
| GAPDH (1) | GAPDH (2) | GAPDH (3) |

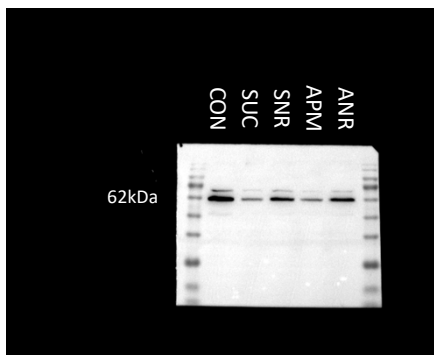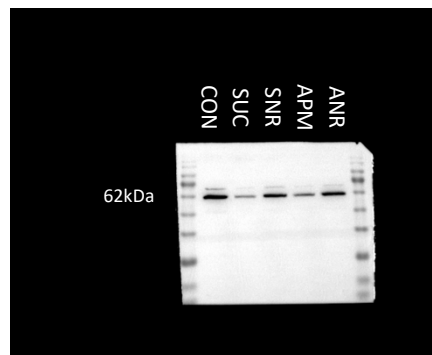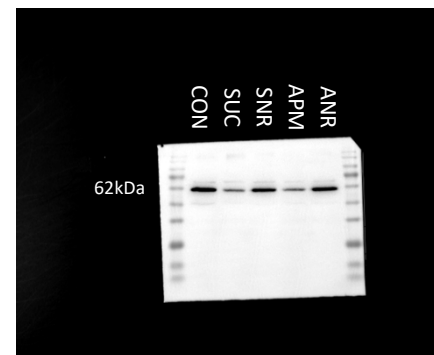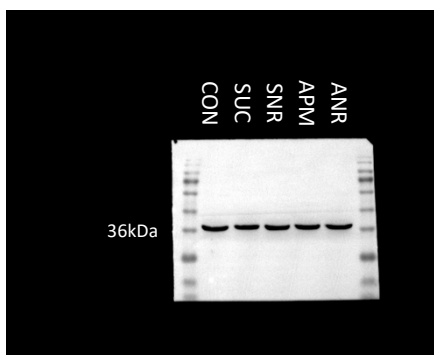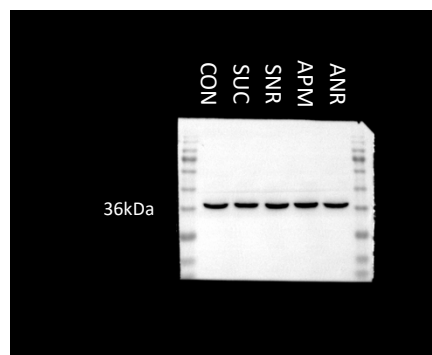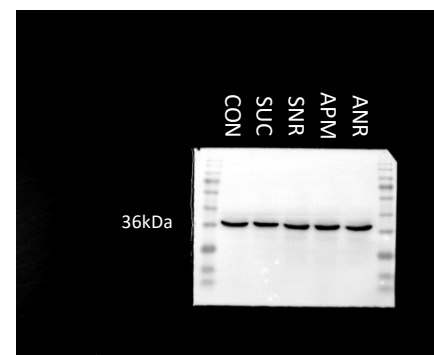

Hippocampus

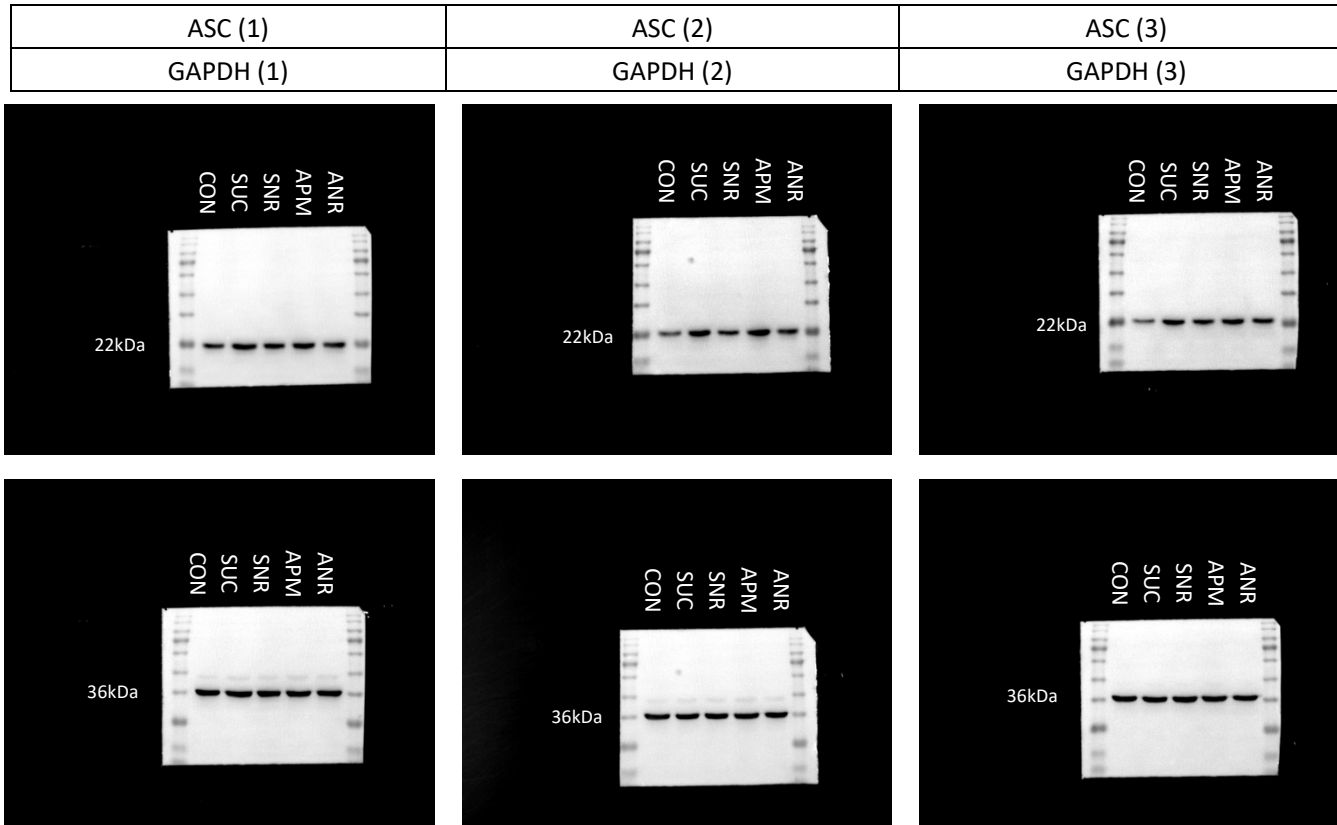



| Caspase 1 (1) | Caspase 1 (2) | Caspase 1 (3) |
|---------------|---------------|---------------|
| GAPDH (1)     | GAPDH (2)     | GAPDH (3)     |

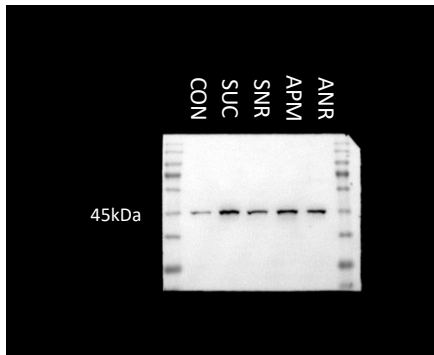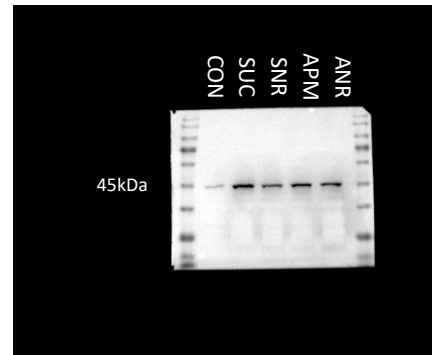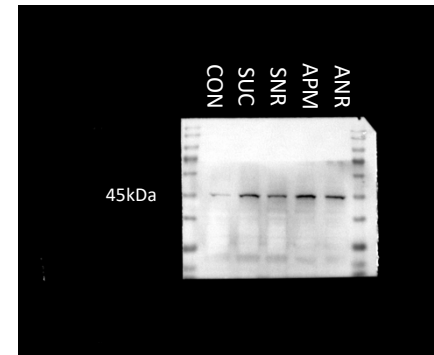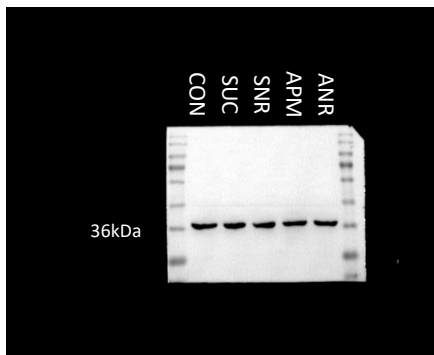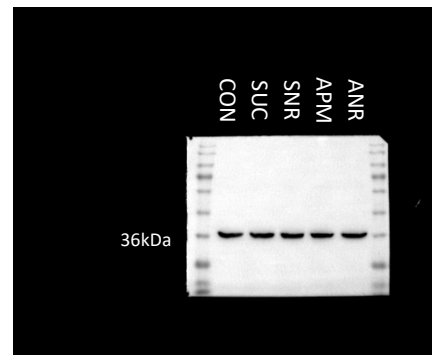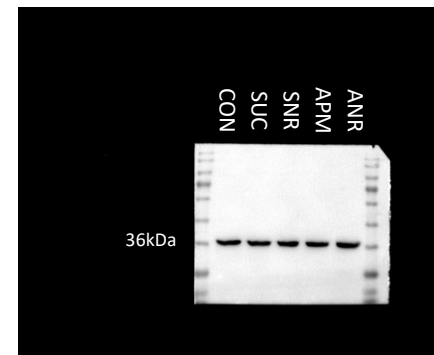

|                  |                  |                  |
|------------------|------------------|------------------|
| IL-1 $\beta$ (1) | IL-1 $\beta$ (2) | IL-1 $\beta$ (3) |
| GAPDH (1)        | GAPDH (2)        | GAPDH (3)        |

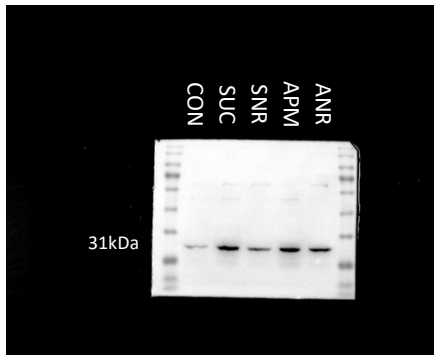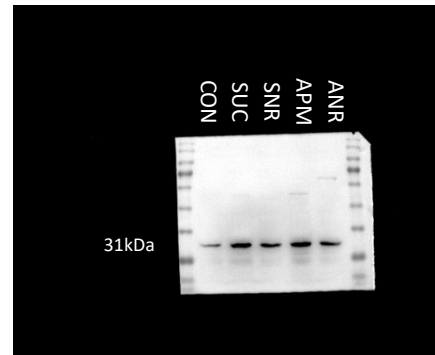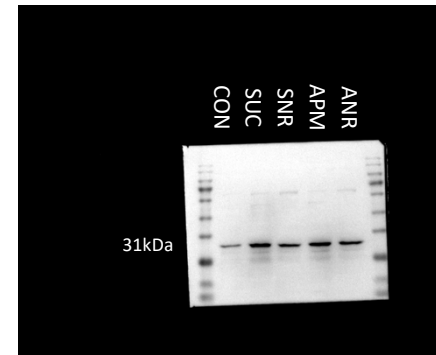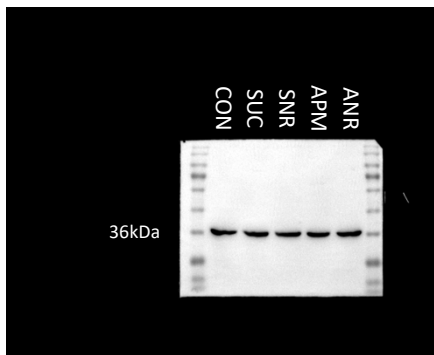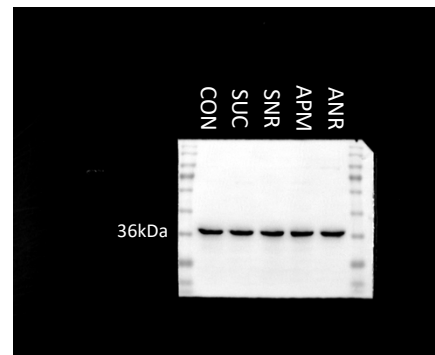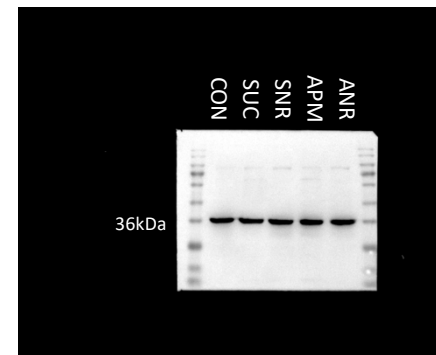

|           |           |           |
|-----------|-----------|-----------|
| IL-18 (1) | IL-18 (2) | IL-18 (3) |
| GAPDH (1) | GAPDH (2) | GAPDH (3) |

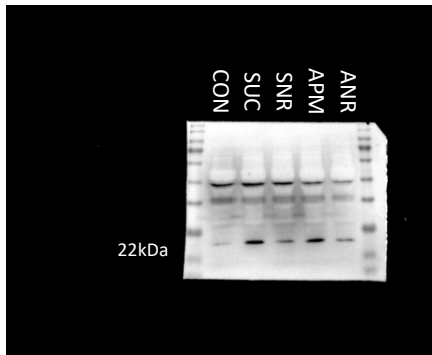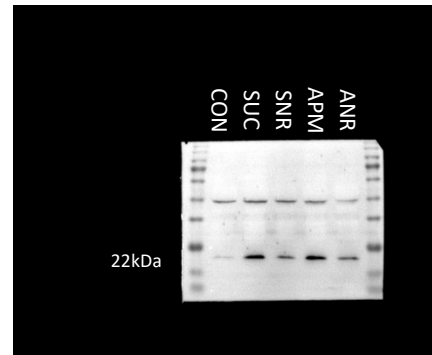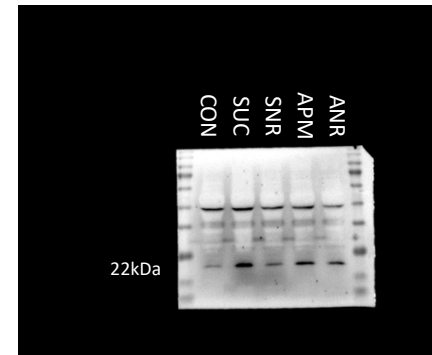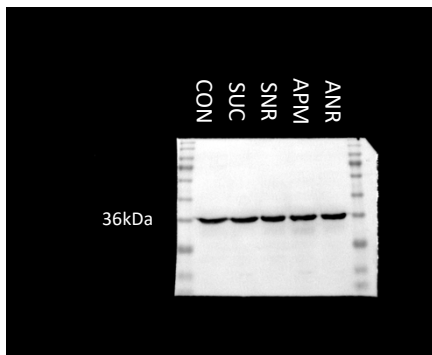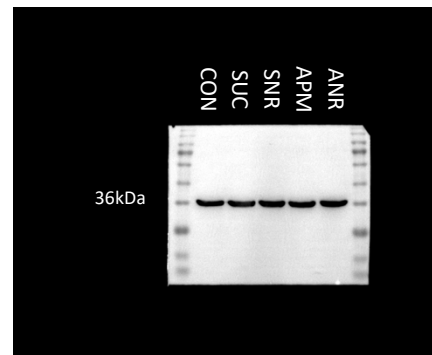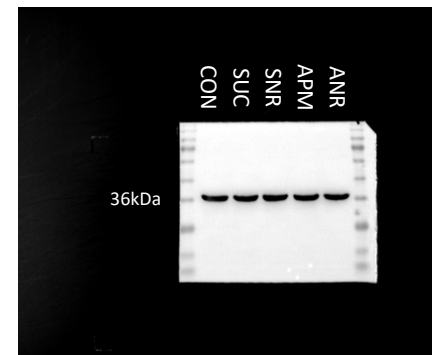

|           |           |           |
|-----------|-----------|-----------|
| NLRP3 (1) | NLRP3 (2) | NLRP3 (3) |
| GAPDH (1) | GAPDH (2) | GAPDH (3) |

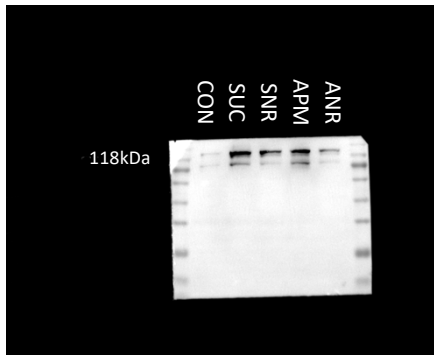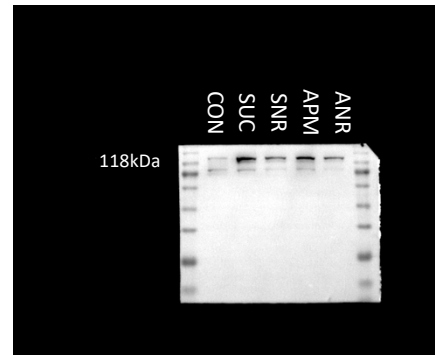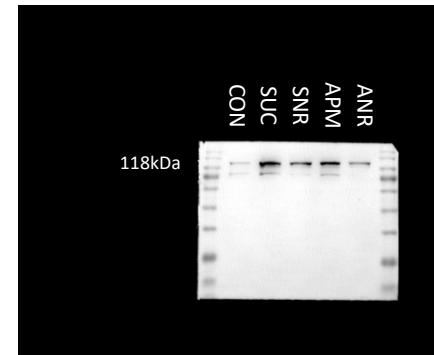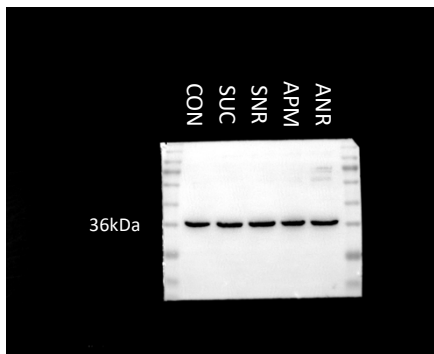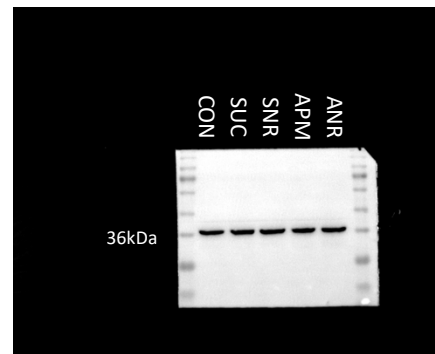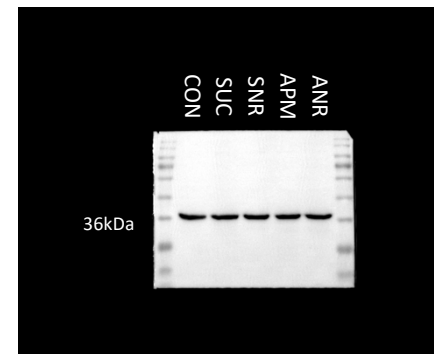

|                    |                    |                    |
|--------------------|--------------------|--------------------|
| NF- $\kappa$ B (1) | NF- $\kappa$ B (2) | NF- $\kappa$ B (3) |
| GAPDH (1)          | GAPDH (2)          | GAPDH (3)          |

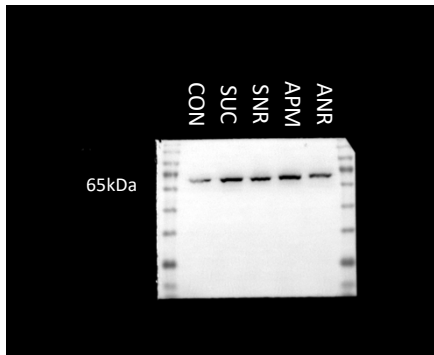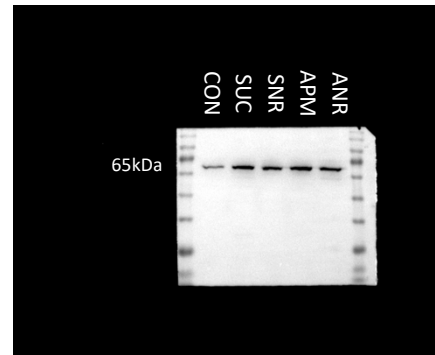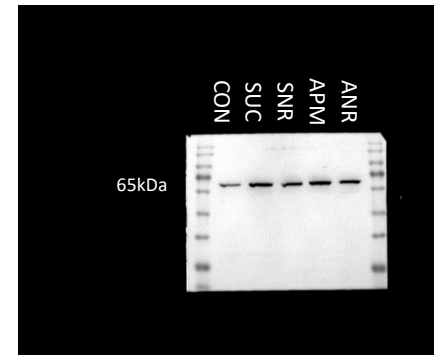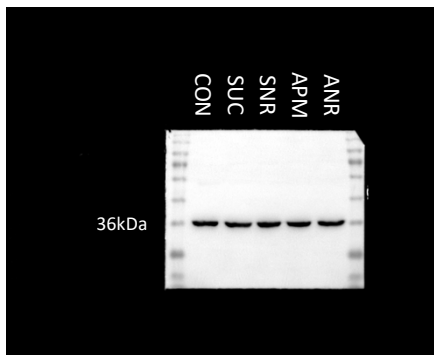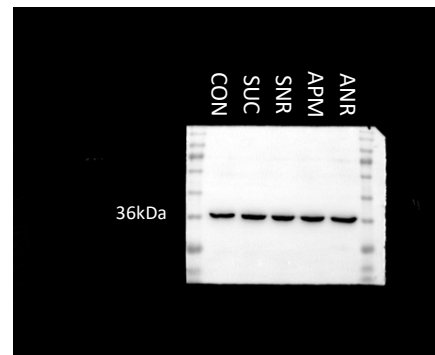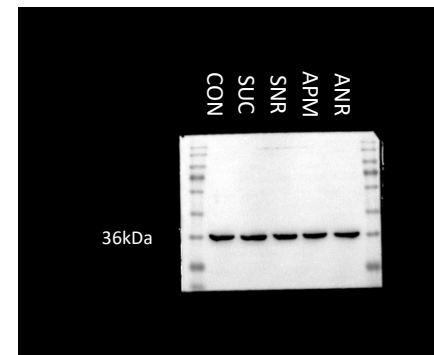

|           |           |           |
|-----------|-----------|-----------|
| TLR4 (1)  | TLR4 (2)  | TLR4 (3)  |
| GAPDH (1) | GAPDH (2) | GAPDH (3) |

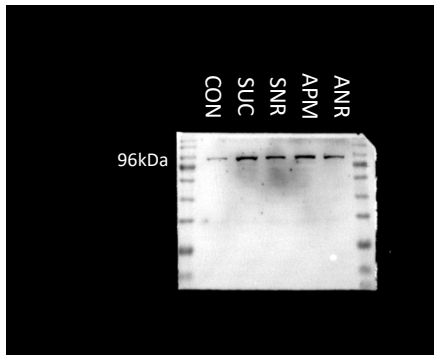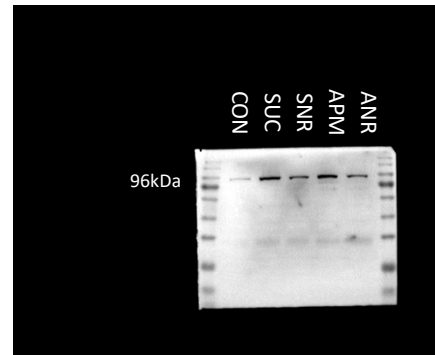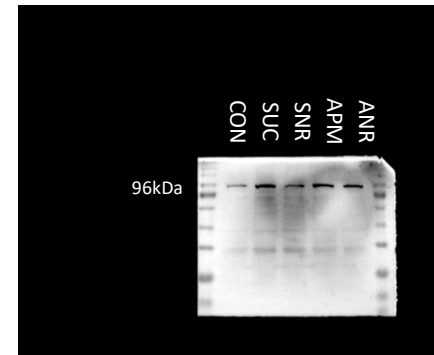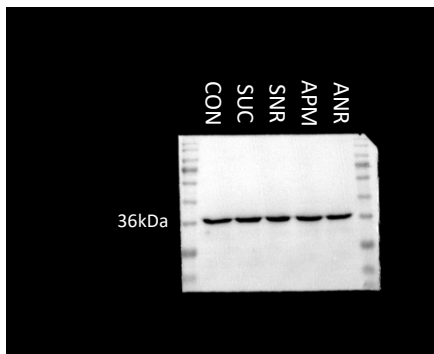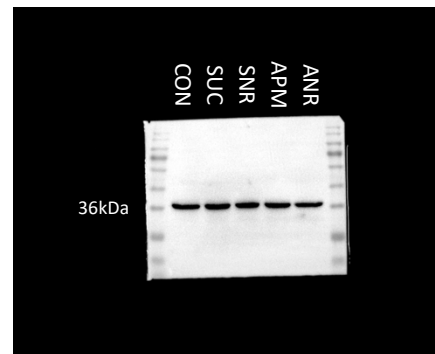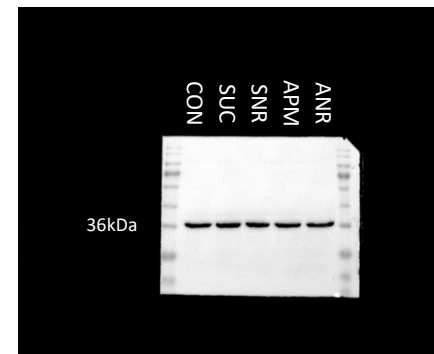

Supplement: d4fo05553e1.pdf [file d4fo05553e1.pdf]
